# Supplementary material for: Understanding Human-Virus Protein-Protein Interactions Using a Human Protein Complex-Based Analysis Framework
Source: PubMed Central journal article supplement (PMC6456672; doi:10.1128/msystems.00303-18), 2019-04-09

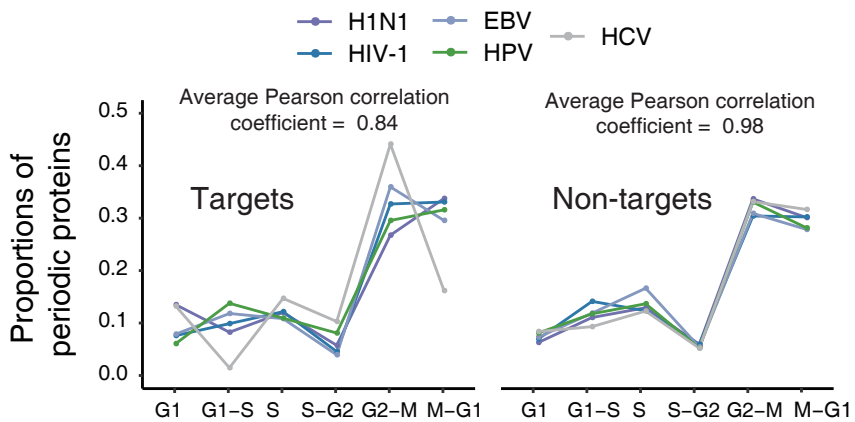

Supplement: mSystems.00303-18-sf003.pdf [file mSystems.00303-18-sf003.pdf]
