# Supplementary material for: Understanding Human-Virus Protein-Protein Interactions Using a Human Protein Complex-Based Analysis Framework
Source: PubMed Central journal article supplement (PMC6456672; doi:10.1128/msystems.00303-18), 2019-04-09

● G1 ● G1-S ● S ● S-G2 ● G2-M ● M-G1 ● Non-periodic ▼ Viral protein

## H1N1

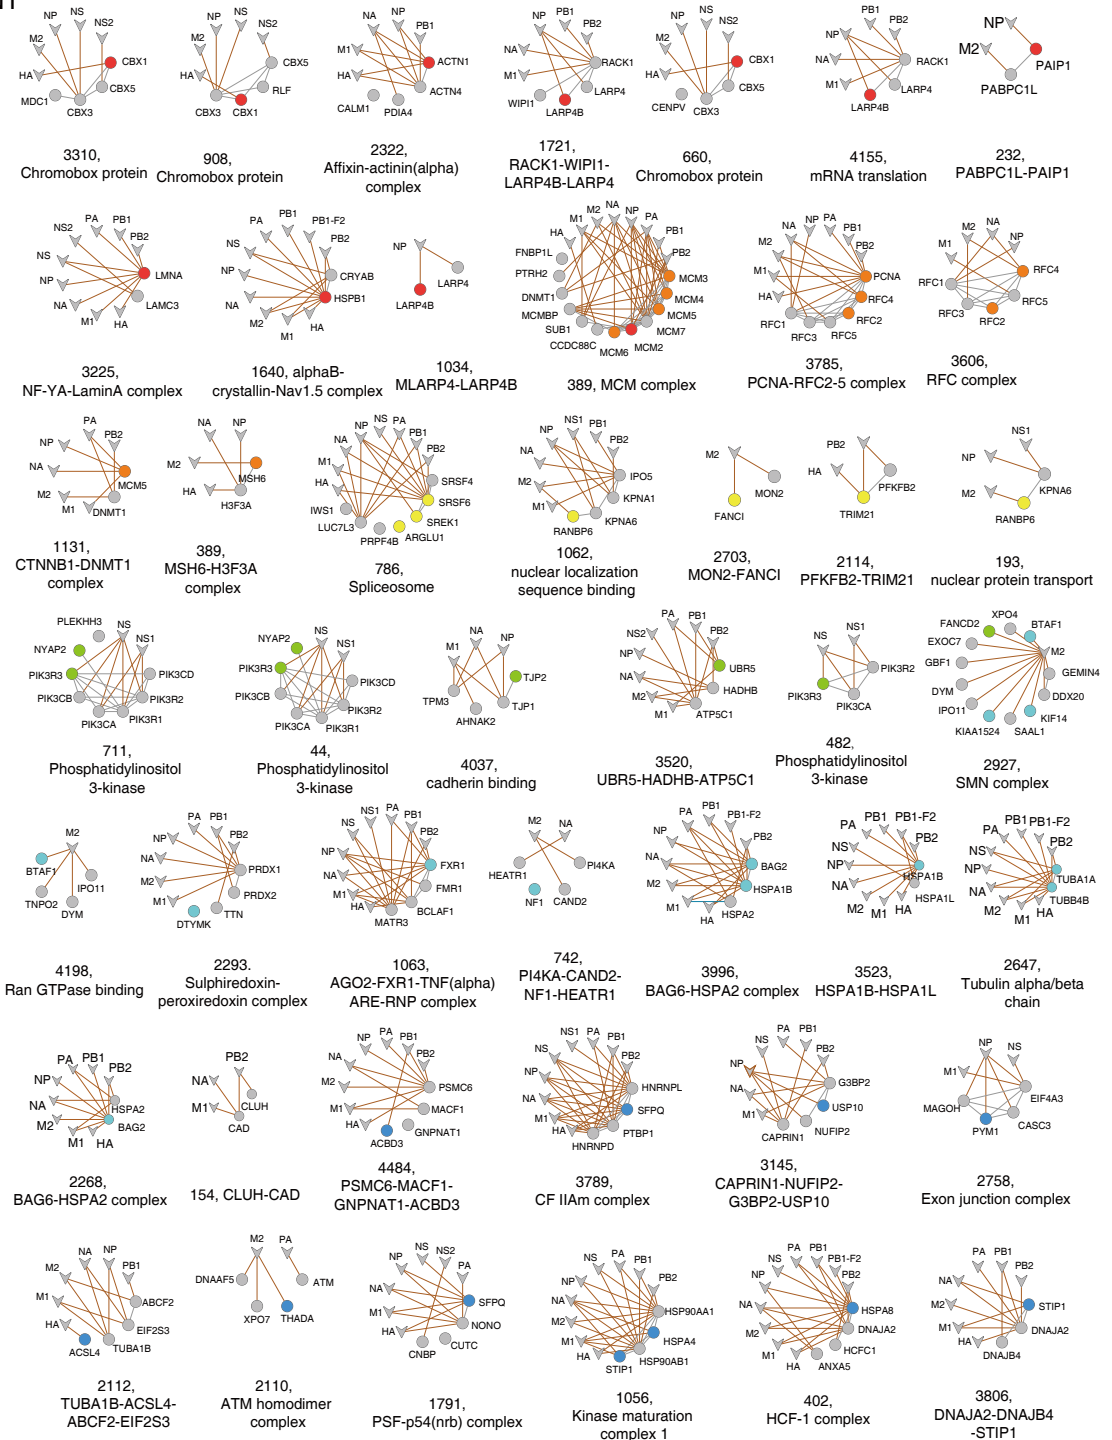

## HIV-1

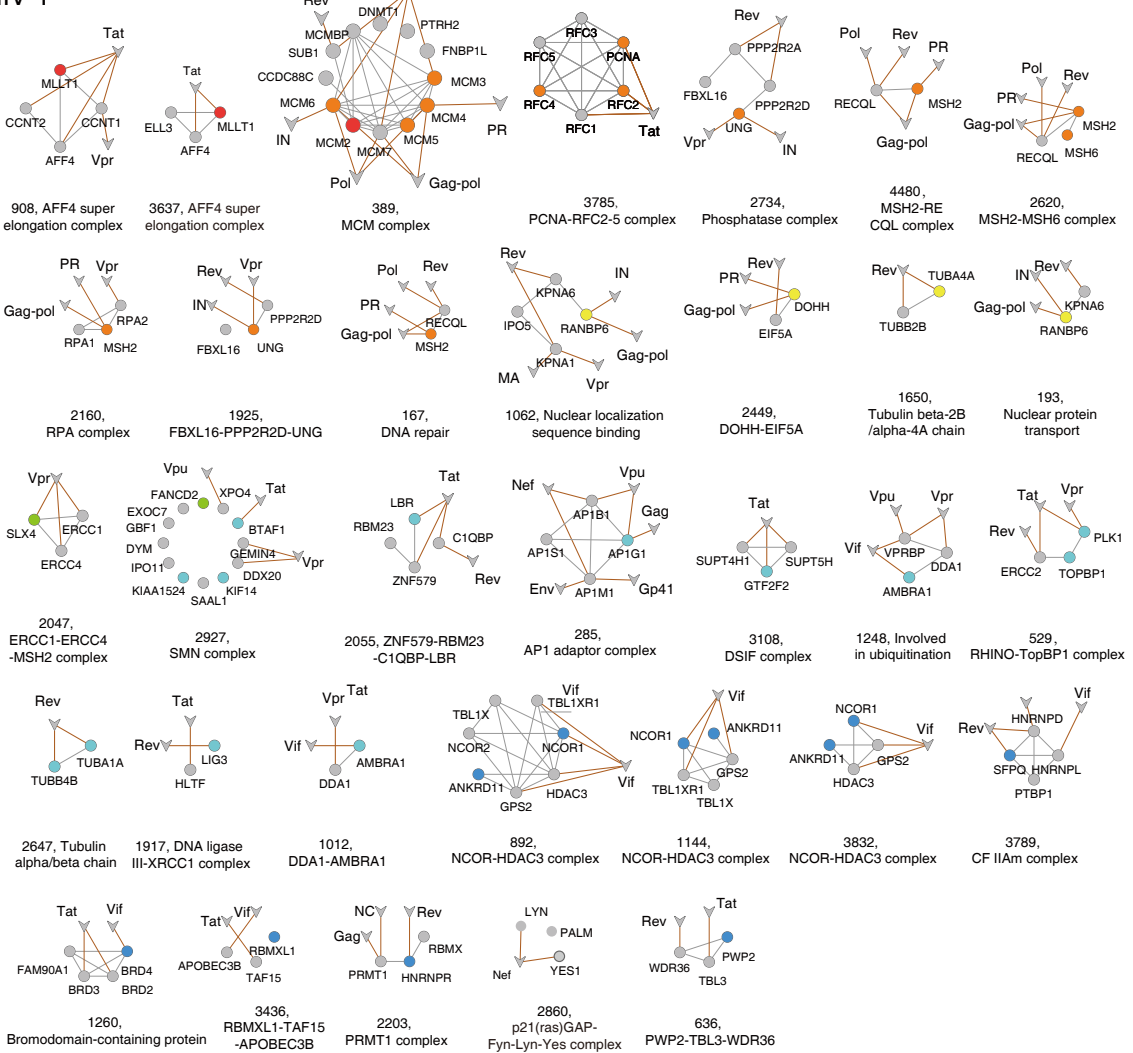

## EBV

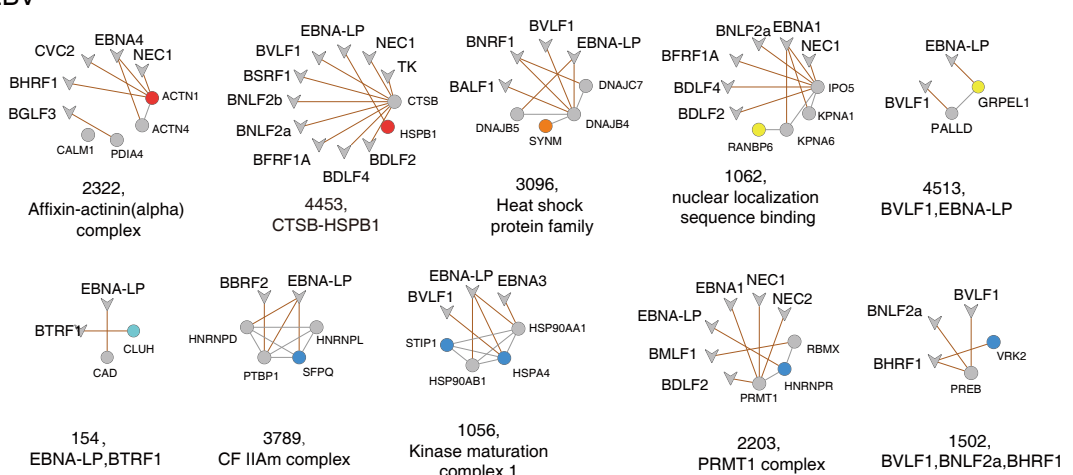

## HPV

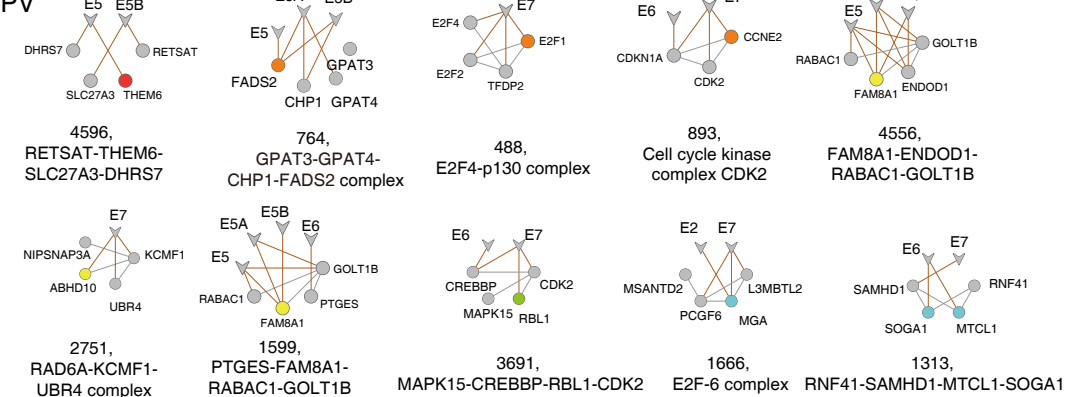

## HCV

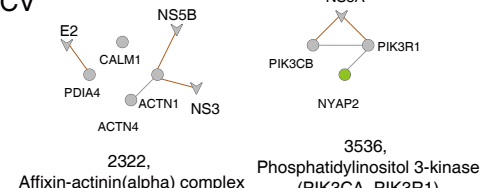

Supplement: mSystems.00303-18-sf004.pdf [file mSystems.00303-18-sf004.pdf]
