# Supplementary material for: Understanding Human-Virus Protein-Protein Interactions Using a Human Protein Complex-Based Analysis Framework
Source: PubMed Central journal article supplement (PMC6456672; doi:10.1128/msystems.00303-18), 2019-04-09
Supplement: mSystems.00303-18-sf006.pdf [file mSystems.00303-18-sf006.pdf]

### ① Input keywords

UniProt ID, protein/gene name, complex name/ID are supported.

Protein/Gene name ▼ Input search keywords Search Reset

### ② Choose an interested virally-targeted complexes

Information about the query protein/gene and virally-targeted complexes are presented.

| UniProtKB | Protein names             | Gene names | Virus | Complex id | Complex name                                                         | Complex size | Target ratio | P-value  | Q-value  | Details              |
|-----------|---------------------------|------------|-------|------------|----------------------------------------------------------------------|--------------|--------------|----------|----------|----------------------|
| P12504    | Virion infectivity factor | Vif        | HIV-1 | 1663       | BAG6-HSPA2 complex                                                   | 5            | 0.80 (4/5)   | 4.84E-05 | 1.16E-03 | <a href="#">View</a> |
| P12504    | Virion infectivity factor | Vif        | HIV-1 | 646        | Cullin-RING E3 ubiquitin ligase complex                              | 4            | 0.75 (3/4)   | 6.89E-04 | 7.36E-03 | <a href="#">View</a> |
| P12504    | Virion infectivity factor | Vif        | HIV-1 | 779        | Cullin-RING E3 ubiquitin ligase complex                              | 4            | 0.75 (3/4)   | 6.89E-04 | 7.36E-03 | <a href="#">View</a> |
| P12504    | Virion infectivity factor | Vif        | HIV-1 | 2339       | KPNA4-HUWE1-KPNA3                                                    | 3            | 0.67 (2/3)   | 9.20E-03 | 4.71E-02 | <a href="#">View</a> |
| P12504    | Virion infectivity factor | Vif        | HIV-1 | 534        | DDB2 complex                                                         | 21           | 0.62 (13/21) | 7.42E-12 | 1.16E-09 | <a href="#">View</a> |
| P12504    | Virion infectivity factor | Vif        | HIV-1 | 4442       | Ubiquitin E3 ligase (CSN1, CSN8, HRT1, SKP1, SKP2, CUL1, CUL2, CUL3) | 8            | 0.38 (3/8)   | 8.12E-03 | 4.71E-02 | <a href="#">View</a> |
| P12504    | Virion infectivity factor | Vif        | HIV-1 | 458        | KPNA4-BCL11A-NRDC-HUWE1-KPNA3                                        | 5            | 0.60 (3/5)   | 1.65E-03 | 1.50E-02 | <a href="#">View</a> |
| P12504    | Virion infectivity factor | Vif        | HIV-1 | 2846       | PA28gamma complex                                                    | 3            | 0.33 (1/3)   | 1.60E-01 | 2.44E-01 | <a href="#">View</a> |
| P12504    | Virion infectivity factor | Vif        | HIV-1 | 1241       | PA28gamma complex                                                    | 6            | 0.17 (1/6)   | 2.95E-01 | 3.16E-01 | <a href="#">View</a> |
| P12504    | Virion infectivity factor | Vif        | HIV-1 | 1782       | DNAJB6-DNAJB8-DNAJB2                                                 | 3            | 0.33 (1/3)   | 1.60E-01 | 2.44E-01 | <a href="#">View</a> |

Showing 1 to 10 of 101 entries

Previous 1 2 3 4 5 ... 11 Next

### ③ Download information about virally-targeted complexes

Information such as host dependency factors, innate immune-related proteins and potential drug targets and drugs are presented.

Save Image As JPG Save Image As Text

Detailed information about virally-targeted complex

Complex ID: 1663  
Complex name: BAG6-HSPA2 complex  
Targeted by virus: HIV-1  
virally-targeted significance: 1.16E-03  
Targeted by other viruses: H1N1 EBV HCV  
Number of targets/Complex size: 4/5  
Complex subunits: GET4 UBL4A BAG6 RNF126 ASNA1  
Host dependent factors: BAG6  
Differential expression genes: NA  
Innate immune-related proteins: NA  
Potential drug targets: ASNA1  
Potential drug-target interactions: DB00171-ASNA1

## Steps for using VTcomplex
